# Supplementary material for: Identification and characterization of novel serum microRNA candidates from deep sequencing in cervical cancer patients
Source: PubMed Central journal article supplement (PMC4152751; doi:10.1038/srep06277), 2014-09-03
Supplement: srep06277-s1.pdf [file srep06277-s1.pdf]

**Identification and characterization of novel serum microRNA candidates from  
deep sequencing in cervical cancer patients**

Li Juan<sup>#,1</sup>, Hong-li Tong<sup>#,1</sup>, Pengjun Zhang<sup>#,1</sup>, Guanghong Guo<sup>1</sup>, Zi Wang<sup>1</sup>, Xinyu  
Wen<sup>1</sup>, Zhennan Dong<sup>1</sup>, Ya-ping Tian \*

1. Department of Clinical Biochemistry, State Key Laboratory of Kidney Disease,  
Chinese PLA General Hospital, Beijing, China, 100853

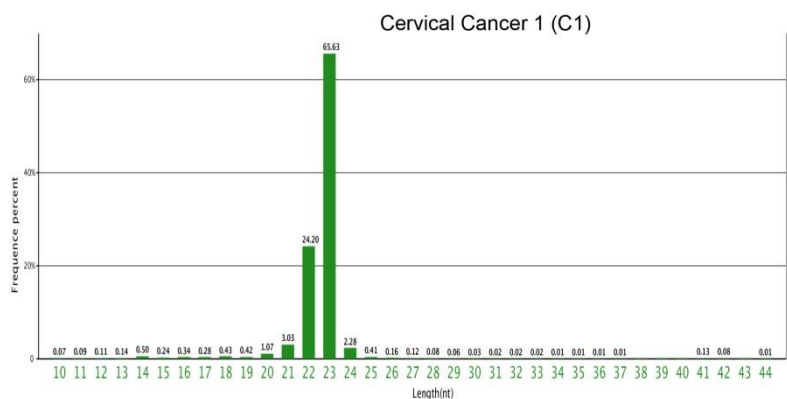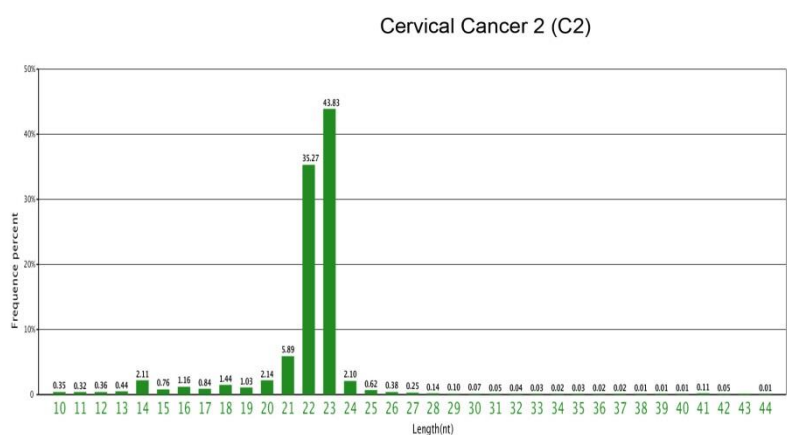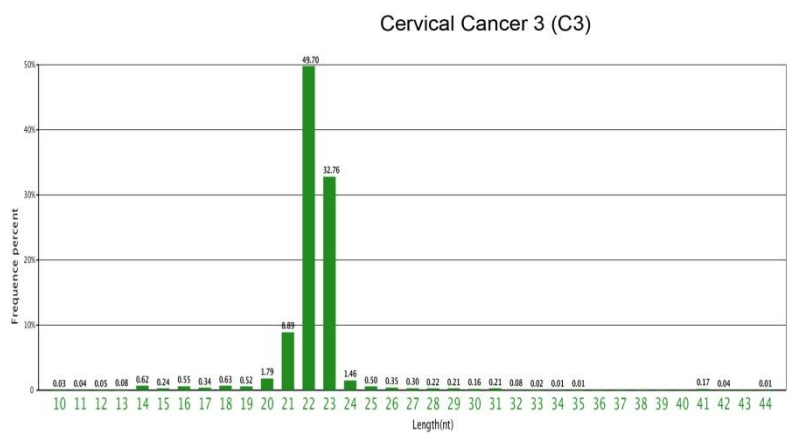

**Figure 1.** Length distribution for 3 serum pools of cervical cancer patients

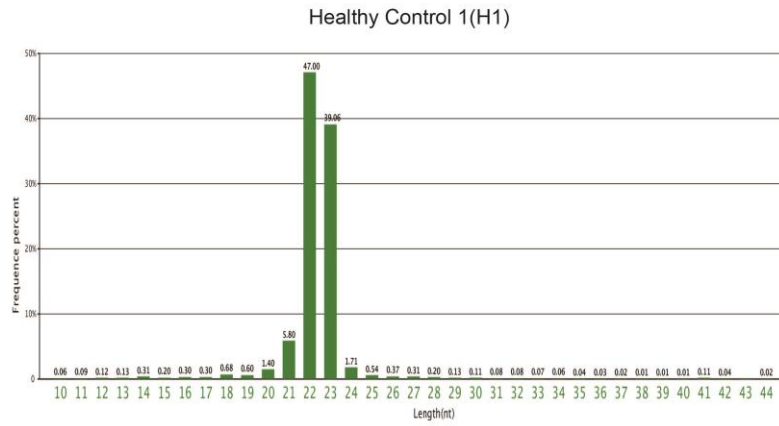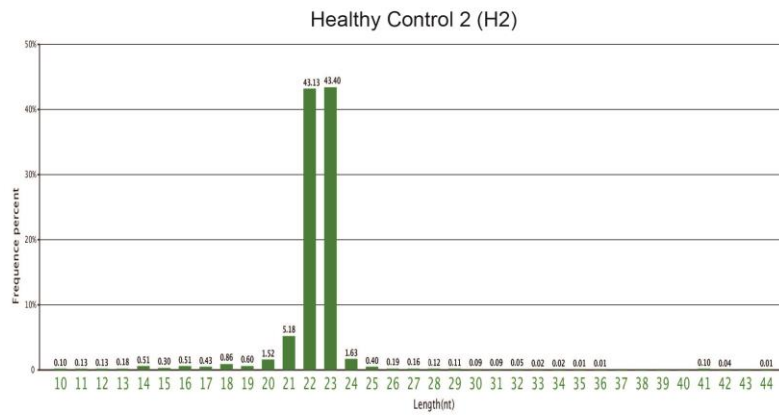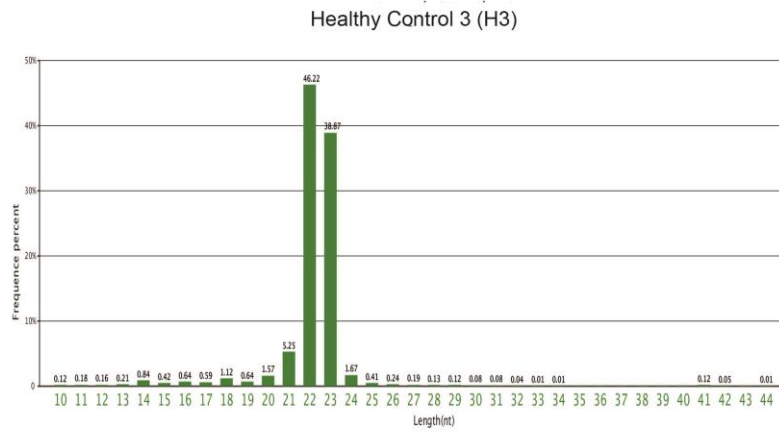

**Figure 2.** Length distributions for 3 serum pools of healthy controls

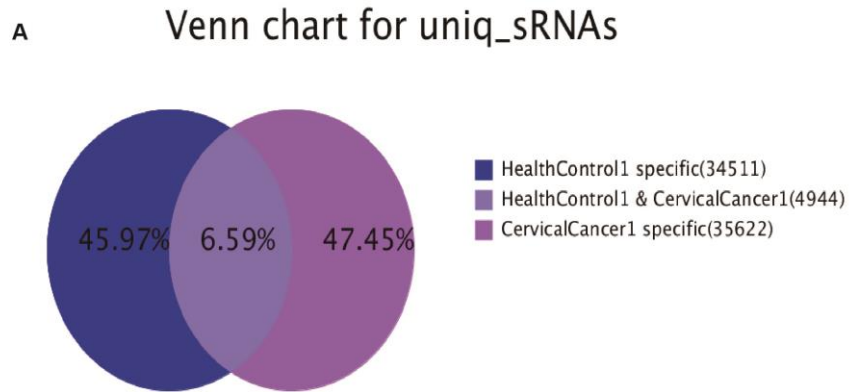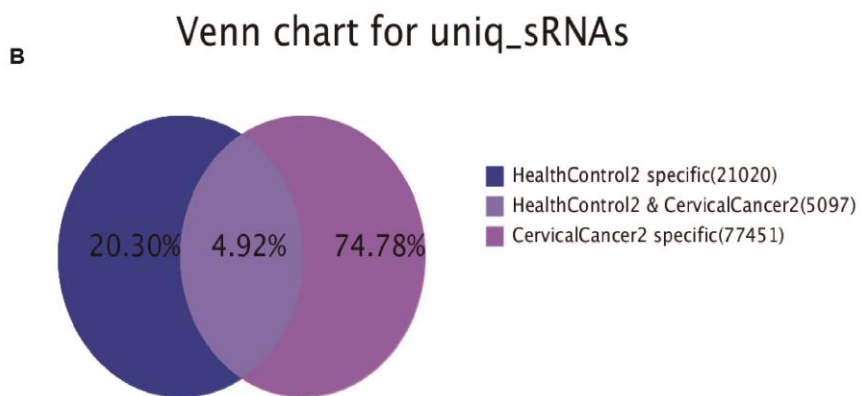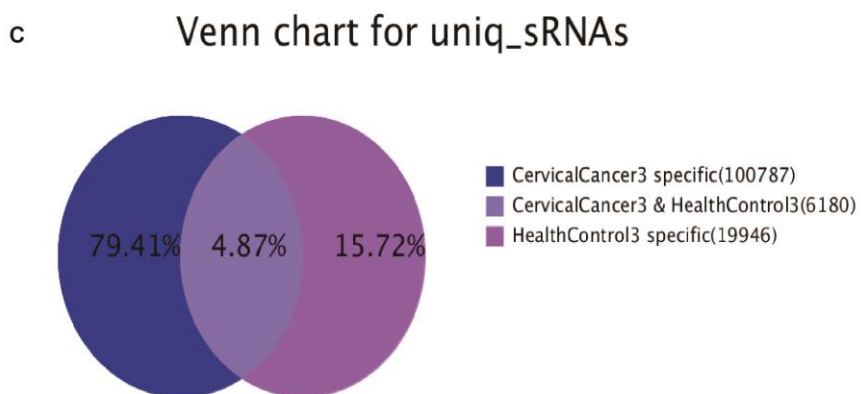

**Figure 3.** Common and specific of unique small RNA sequence between cervical cancer patients (N=9, each 3 replicate) and healthy controls (N=9, each 3 replicate) detected by Solexa sequencing

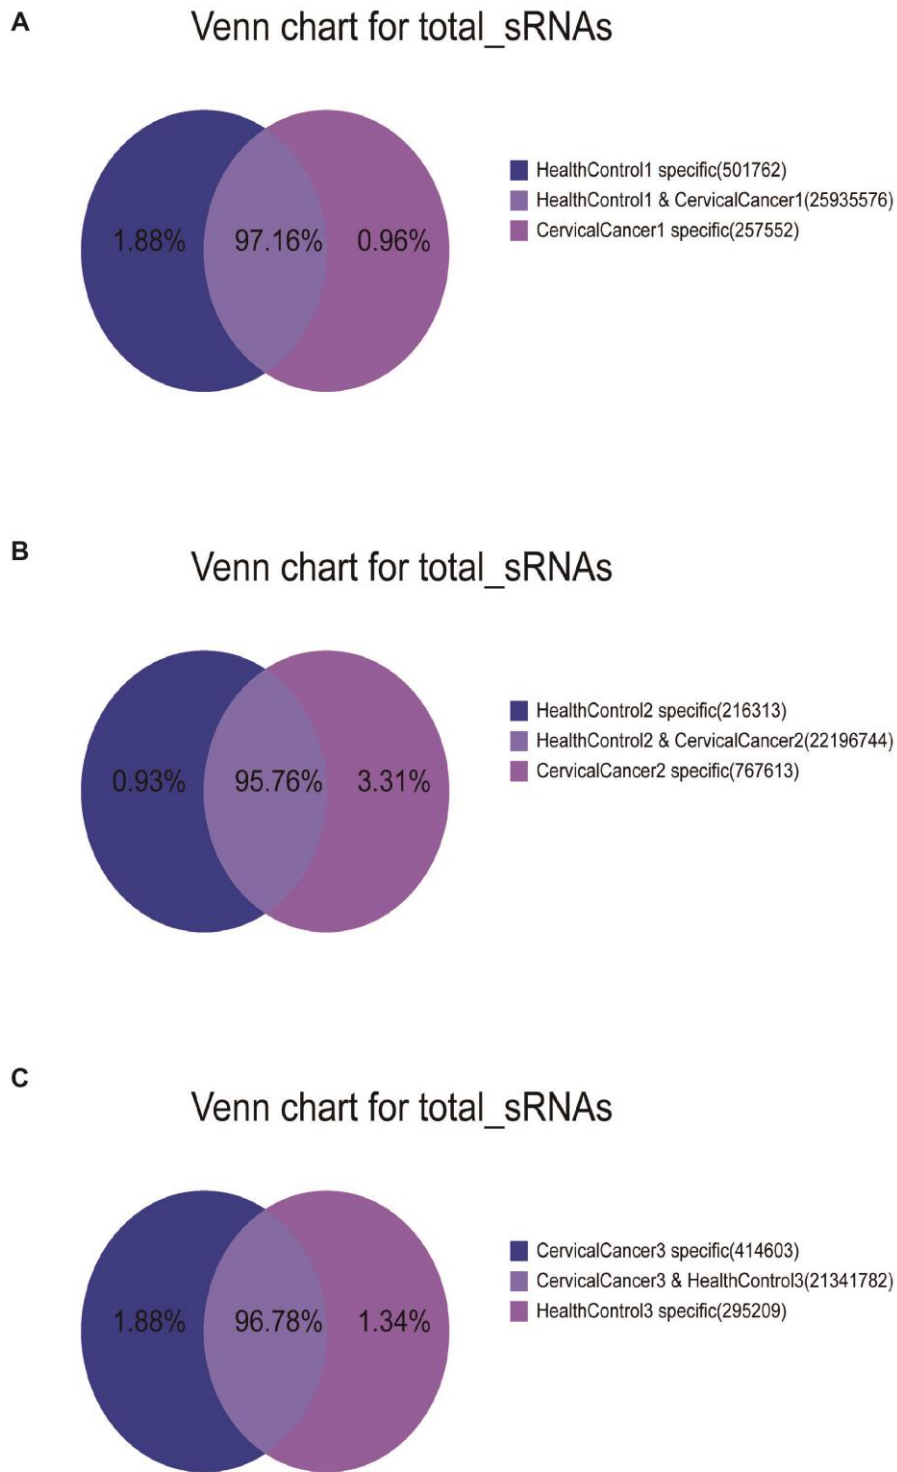

**Figure 4.** Common and specific of total small RNA sequence between cervical cancer patients (N=9, each 3 replicate) and healthy controls (N=9, each 3 replicate) detected by Solexa sequencing

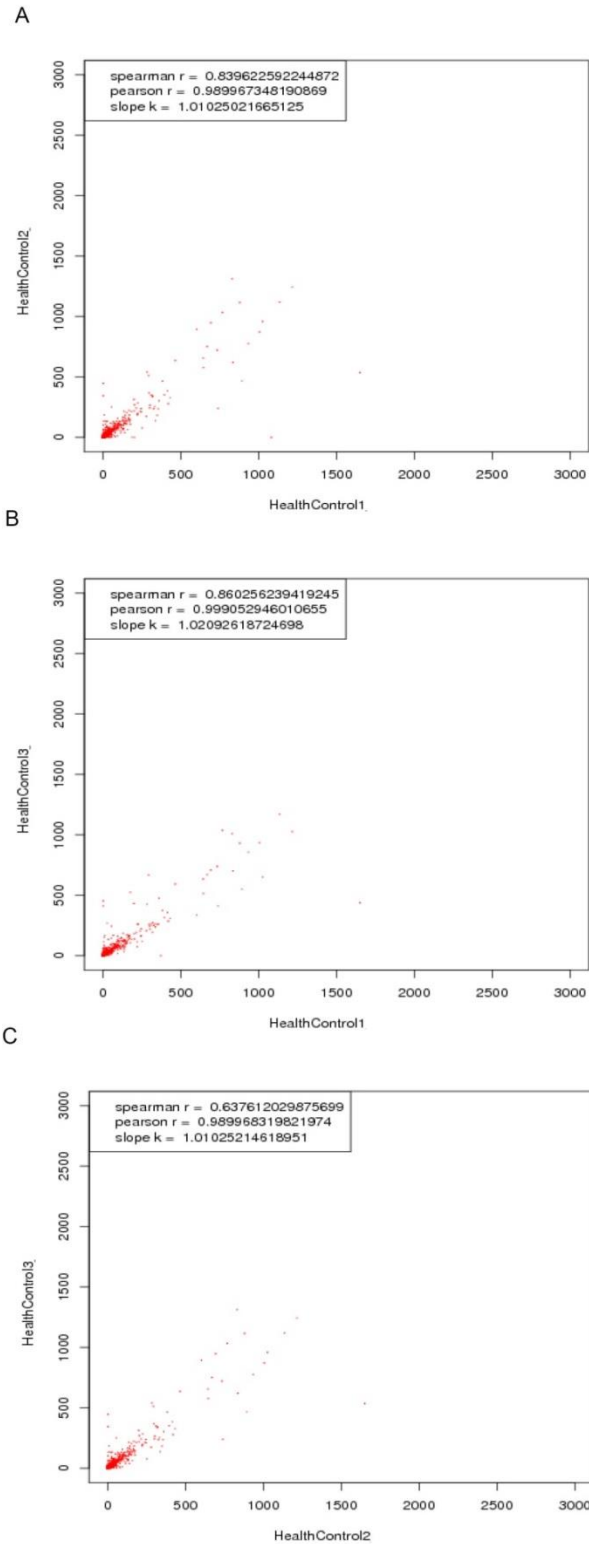

**Figure 5.** Repeat analysis of the three replicate of serum pools of healthy control group by Solexa sequencing (A) Correlation analysis between serum pools of healthy control group (H1) and group2 (H2); (B) Correlation analysis between serum pools of

healthy control group (H1) and group3 (H3); (C) Correlation analysis between serum  
pools of healthy control group 2 (H2) and group 3 (H3)





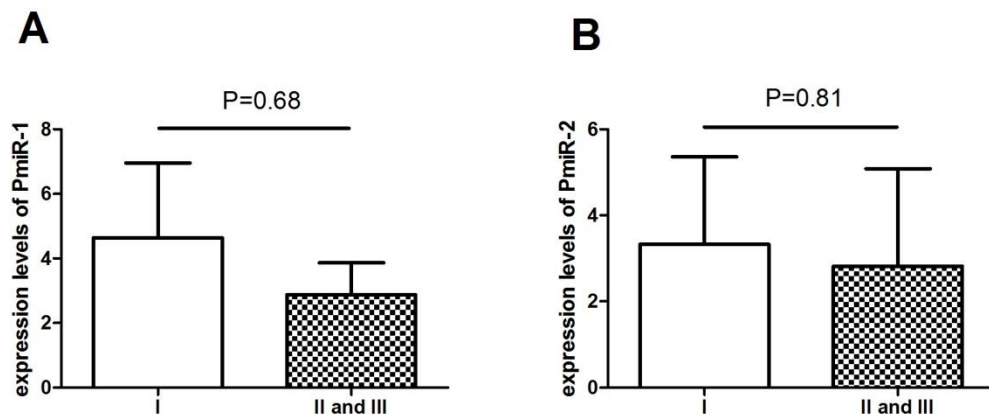

**Figure 7.** Comparison of the 2 novel miRNAs expression levels between cervical cancer patients with stage I (N=76) and with stage II and III (N=36)

A, PmiR-1; B, PmiR-2

**A**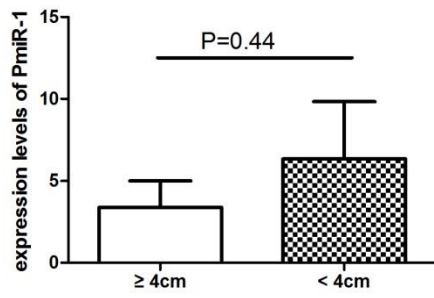**B**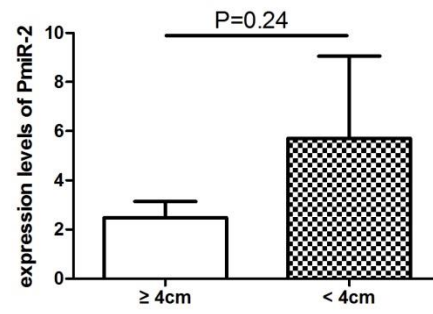

**Figure 8.** Comparison of the 2 novel miRNAs expression levels between cervical cancer patients with tumor size  $\geq 4$  cm (N=20) and tumor size  $< 4$  cm (N=59)

A, PmiR-1; B, PmiR-2

**A**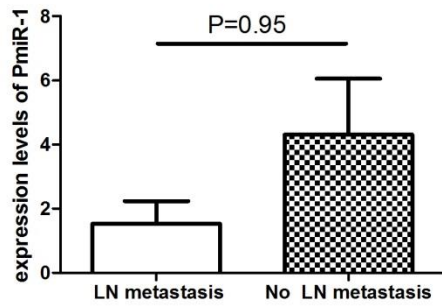**B**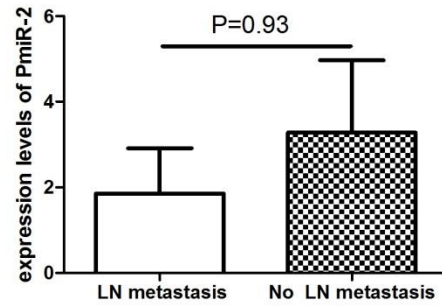

**Figure 9.** Comparison of the 2 novel miRNAs expression levels between cervical cancer patients with positive lymph node metastasis (N=9) and negative lymph node metastasis (N=103)

A, PmiR-1; B, PmiR-2

**A**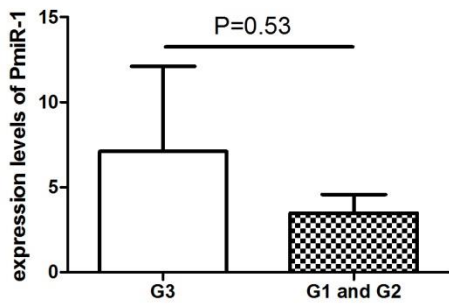**B**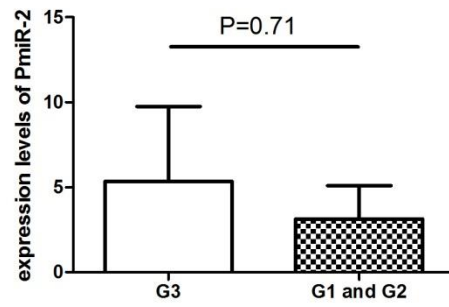

**Figure 10.** Comparison of the 2 novel miRNAs expression levels between cervical cancer patients with tumor grade G3 (N=9) and tumor grade G1 and G2 (N=103)

A, PmiR-1; B, PmiR-2

**Table 1. Clinical data for 112 cervical cancer patients and 82 healthy controls in validation set**

|                       | <b>Cervical cancer</b>                                                                   | <b>Healthy control</b> | <b>P Value</b> |
|-----------------------|------------------------------------------------------------------------------------------|------------------------|----------------|
| <b>Female,N</b>       | 112                                                                                      | 85                     |                |
| <b>Age</b>            | 47.86±9.88                                                                               | 46.16±10.11            | 0.172          |
| <b>U6</b>             | 31.19(30.09,32.85)                                                                       | 31.92(30.45,33.30)     | 0.081          |
| <b>Stype</b>          | Squamous cell carcinoma of the cervix,<br>n=108<br><br>Adenocarcinoma of the cervix, N=4 |                        |                |
| <b>Clinical stage</b> | Stage I, N=76<br><br>Stage II, N=34<br><br>Stage III, N=2                                |                        |                |
| <b>Tumor size</b>     | ≥4cm, N=20                                                                               |                        |                |

|                                  |
|----------------------------------|
| <4cm,N=59                        |
| No description, N=33             |
| <b>Pathologic<br/>al grading</b> |
| G1, N=3                          |
| G2, N=39                         |
| G3, N=35                         |
| No description, N=35             |
| <b>LN<br/>metastasis</b>         |
| Positive, N=9                    |
| Negative, N=103                  |

Table 2. Serum miRNAs differentially expressed in cervical cancer cases compared to healthy controls.

|               | <b>Healthy Control</b> | <b>Cervical Cancer</b> | <b>Fold Change</b> | <b>P Value</b> |
|---------------|------------------------|------------------------|--------------------|----------------|
| <b>PmiR-1</b> | 20.45 (9.17,68.24)     | -4.34 (-5.89, -2.61)   | 4.08               | p<0.0001       |
| <b>PmiR-2</b> | 3.53 (1.48,11.09)      | 0.21 (-1.86, 1.64)     | 3.17               | p<0.0001       |

**Table 3. The AUC, Youden index, sensitivity, specificity and 95% CI of biomarkers when diagnosed cervical diseases patients (N=112) from healthy controls (N=85)**

| Biomarkers | AUC   | Youden Index | Sensitivity | Specificity | 95% CI         |
|------------|-------|--------------|-------------|-------------|----------------|
| PmiR-1     | 0.921 | 0.739        | 0.857       | 0.882       | (0.883, 0.959) |
| PmiR-2     | 0.827 | 0.586        | 0.821       | 0.765       | (0.767, 0.887) |
| SCC        | 0.690 | 0.407        | 0.455       | 0.952       | (0.605,0.776)  |

Compared to healthy control group, <sup>a</sup> $p < 0.05$
